# Supplementary material
Source: HighWire-hosted journal article supplement (https://bmjopen.bmj.com/content/14/12/e087438)

**Supplemental Figure 1. Number of post-menarchal female students recruited and analysed**

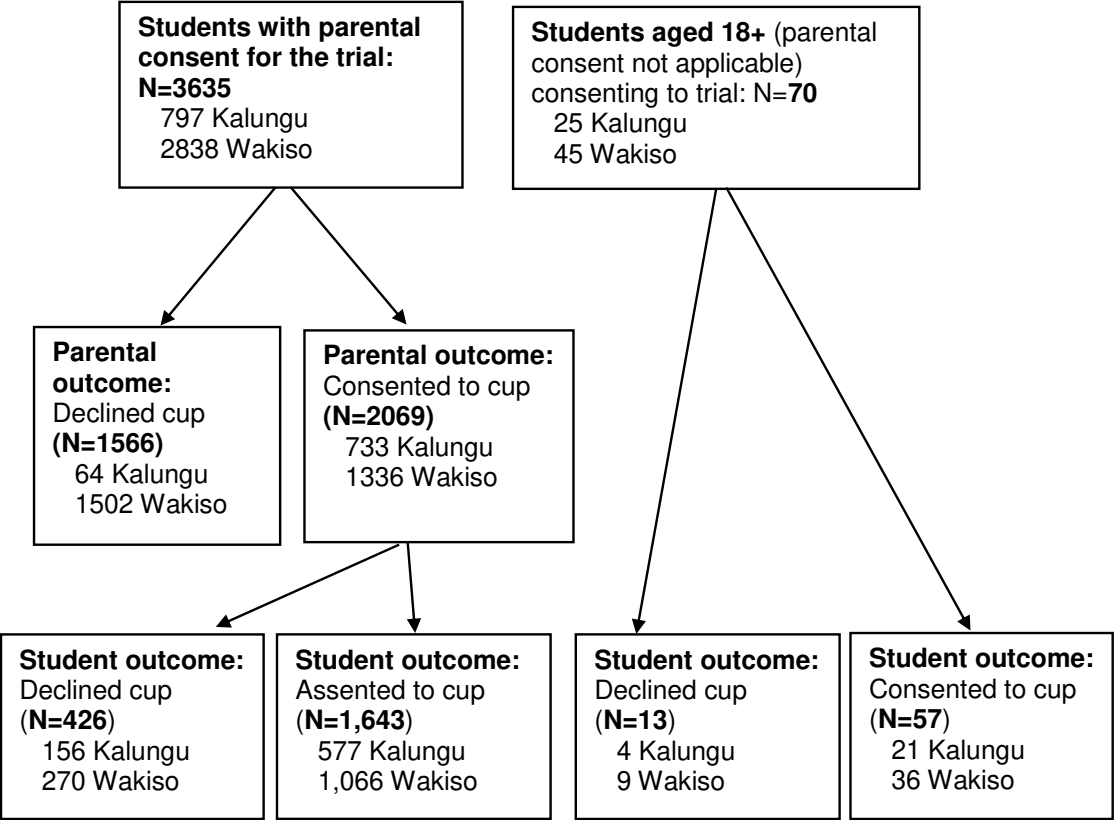

Supplement: inline-supplementary-material-1 [file inline-supplementary-material-1.pdf]
